# Supplementary material
Source: PubMed Central journal article supplement (PMC3930313)

Supplemental Figure 2

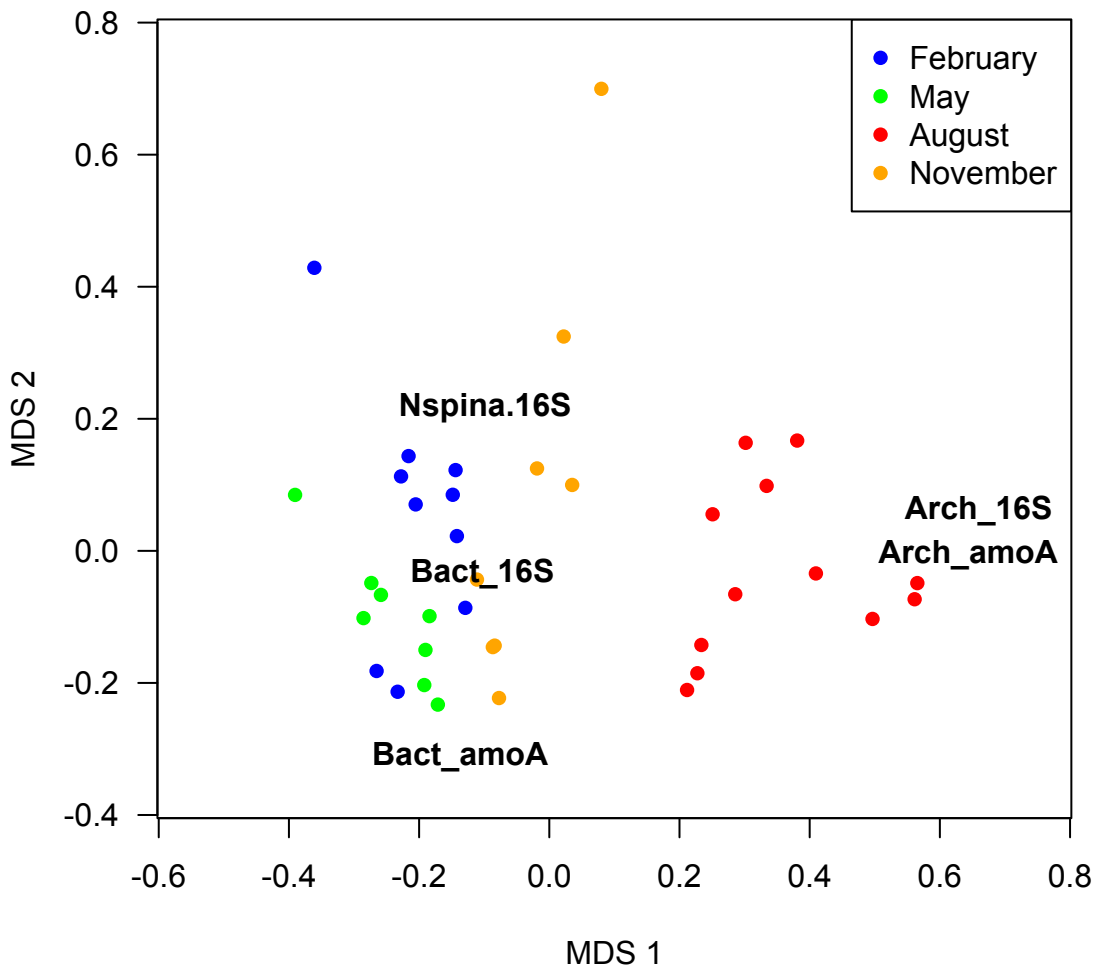

Supplement: ismej2013171x2.pdf [file ismej2013171x2.pdf]
